# Supplementary material for: The shortest Th–Th distance from a new type of quadruple bond
Source: Royal Society of Chemistry journal article supplement (doi:10.1039/c7cp00113d), 2017-01-01
Supplement: c7cp00113d1.pdf [file c7cp00113d1.pdf]

# The shortest Th–Th distance from a new type of quadruple bond

Han-Shi Hu and Nikolas Kaltsoyannis

School of Chemistry, The University of Manchester, Oxford Road, Manchester M13 9PL, UK

Email: [nikolas.kaltsoyannis@manchester.ac.uk](mailto:nikolas.kaltsoyannis@manchester.ac.uk)

## Supporting Information

### *Contents*

- I. Additional and computational details**
- II. Tables**
- III. *xyz* coordinates and total SCF energies**

#### **I. Additional computational details**

For calculations in the ADF 2014.01 program, the criteria of the grid size, SCF and geometry convergence are 6.0 (Accint), 1e-6 (SCFcv) and 1e-4 (TolE and TolG) and the others (TolR & TolA) were set as defaults. As  $\text{Cy}_3\text{PThThPCy}_3$  and  $\text{Ph}_3\text{PThThPPh}_3$  are rather large systems, Slater type orbital basis sets of double-zeta plus one polarization function (DZP) were used for the atoms of these two molecules except Th, for which TZP was used.

For calculations in the Molpro 2015.1 program, the global threshold for the smallest allowed eigenvalue of the overlap matrix (THROVL) was set as 1.d-9, all other parameters were employed at their default value.  $D_{3d}$  symmetry was used for all *ab initio* studies on  $\text{H}_3\text{PThThPH}_3$ , including CASPT2, CCSD(T) and SOC calculations. Although the  $D_{3d}$  structure is not quite the most stable at the PBE level (0.54 kJ/mol less stable than the  $C_1$  structure, with a small imaginary frequency of  $21.2i \text{ cm}^{-1}$ ), high symmetry is so helpful for state specification in *ab initio* calculations that we felt the constraint to  $D_{3d}$  symmetry appropriate. The *xyz* coordinates of both of the  $D_{3d}$  and  $C_1$  structures are given in Section III. Note that the Th–Th bond lengths are very similar between these two structures, 2.604 Å ( $D_{3d}$ ) vs 2.607 Å ( $C_1$ ).

## II. Table

Table S1. An–An bond distances reported in the literature. See main text for the source reference numbers.

| Compounds                                                                                                        | An–An (Å)                    |
|------------------------------------------------------------------------------------------------------------------|------------------------------|
| Ac <sub>2</sub>                                                                                                  | 3.64                         |
| Th <sub>2</sub>                                                                                                  | 2.76                         |
| HThThH                                                                                                           | 2.71                         |
| Pa <sub>2</sub>                                                                                                  | 2.37                         |
| U <sub>2</sub>                                                                                                   | 2.43                         |
| PhUUPh                                                                                                           | 2.29                         |
| H <sub>2</sub> UUH <sub>2</sub>                                                                                  | 2.28                         |
| U( $\mu$ -H <sub>2</sub> )U                                                                                      | 2.18                         |
| U <sub>2</sub> <sup>2+</sup>                                                                                     | 2.30                         |
| [U <sub>2</sub> X <sub>8</sub> ] <sup>2-</sup> (X = Cl, Br)                                                      | 2.35                         |
| [Np <sub>2</sub> X <sub>8</sub> ] <sup>2-</sup> (X = Cl, Br)                                                     | 2.20                         |
| [Pu <sub>2</sub> X <sub>8</sub> ] <sup>2-</sup> (X = Cl, Br)                                                     | 2.08                         |
| U <sub>2</sub> X <sub>6</sub> (X = Cl, F, OH, NH <sub>2</sub> , CH <sub>3</sub> )                                | 2.35, 2.38, 2.37, 2.35, 2.36 |
| U <sub>2</sub> (OCHO) <sub>4</sub>                                                                               | 2.33                         |
| U <sub>2</sub> (OCHO) <sub>6</sub>                                                                               | 2.40                         |
| U <sub>2</sub> (OCHO) <sub>4</sub> Cl <sub>2</sub>                                                               | 2.80                         |
| U <sub>2</sub> @C <sub>60</sub>                                                                                  | 2.72                         |
| An <sub>2</sub> (C <sub>8</sub> H <sub>8</sub> ) <sub>2</sub> (An = Th, Pa, U, Np)                               | 2.81, 2.54, 2.24, 2.19       |
| An <sub>2</sub> Cp* <sub>2</sub> (Cp* = C <sub>5</sub> (CH <sub>3</sub> ) <sub>5</sub> , An = Th, Pa, U, Np, Pu) | 2.79, 2.37, 2.58, 2.78, 2.87 |

Table S2. The  $\angle_{\text{L-Th-Th}}$  angles ( $^\circ$ ) and total bonding energies  $E$  (kJ/mol) of the optimised LThThL molecules. Also provided are the  $\angle_{\text{L-Th-Th}}$  angles and energies for modified geometries, derived from the optimised geometries as follows. Starred structures are optimised with symmetry constraints that enforce linearity (*e.g.*  $D_{3d}$  for  $\text{H}_3\text{AsThThAsH}_3$ ). For other compounds this approach did not lead to either SCF or geometry convergence, and hence the other angle data in the same column indicate structures based on the optimised geometries but fixing  $\angle_{\text{L-Th-Th}}$  to be either linear ( $180^\circ$ ) or trans-bent ( $170^\circ$ ), depending on the angle in the fully optimised structure. The energy difference  $\Delta E$  between the two forms is also given.

| Compounds                             | Optimised Geometry        |           | Modified Geometry         |           | $\Delta E$ |
|---------------------------------------|---------------------------|-----------|---------------------------|-----------|------------|
|                                       | $\angle_{\text{L-Th-Th}}$ | $E$       | $\angle_{\text{L-Th-Th}}$ | $E$       |            |
| $\text{H}_3\text{AsThThAsH}_3$        | 169.2                     | -3387.49  | 180.0*                    | -3387.70  | 0.21       |
| $\text{H}_3\text{PThThPH}_3$          | 175.4                     | -3626.69  | 180.0*                    | -3626.15  | -0.54      |
| $\text{Me}_3\text{PThThPMe}_3$        | 179.5                     | -13339.22 | 170.0                     | -13336.1  | -3.12      |
| $\text{Cy}_3\text{PThThPCy}_3$        | 176.2                     | -56433.08 | 180.0                     | -56432.40 | -0.68      |
| $\text{Ph}_3\text{PThThPPh}_3$        | 173.8                     | -43077.79 | 180.0                     | -43074.78 | -3.01      |
| $\text{H}_3\text{NThThNH}_3$          | 180.0                     | -4451.27  | 170.0                     | -4446.04  | -5.23      |
| $\text{NHCThThNHC}$                   | 177.9                     | -11722.65 | 180.0*                    | -11722.56 | -0.09      |
| $\text{H}_2\text{FPThThPFH}_2$        | 169.4                     | -3904.76  | 180.0                     | -3901.16  | -3.60      |
| $\text{HF}_2\text{PThThPF}_2\text{H}$ | 168.2                     | -4194.84  | 180.0                     | -4184.96  | -9.88      |
| $\text{OCThThCO}$                     | 180.0                     | -3665.02  | 170.0                     | -3663.43  | -1.59      |
| $\text{ONThThNO}$                     | 180.0                     | -3487.95  | 170.0                     | -3482.85  | -5.10      |

### III. xyz coordinates (Å) and total SCF energies from DFT (PBE) optimisations of the studied compounds.

H<sub>3</sub>AsThThAsH<sub>3</sub> ( E= -1.29022463 Hartree )

|      |           |           |           |
|------|-----------|-----------|-----------|
| 1.Th | 0.016490  | 0.177982  | 1.282830  |
| 2.Th | -0.016490 | -0.177982 | -1.282830 |
| 3.As | 0.052847  | 0.026569  | 4.319097  |
| 4.H  | 0.053225  | 1.176340  | 5.340517  |
| 5.H  | -1.064935 | -0.732545 | 5.038813  |
| 6.H  | 1.196053  | -0.714165 | 5.018409  |
| 7.As | -0.052847 | -0.026569 | -4.319097 |
| 8.H  | -0.053225 | -1.176340 | -5.340517 |
| 9.H  | -1.196053 | 0.714165  | -5.018409 |
| 10.H | 1.064935  | 0.732545  | -5.038813 |

H<sub>3</sub>PThThPH<sub>3</sub> ( E= -1.38112322 Hartree )\_D<sub>3d</sub>

|      |           |           |           |
|------|-----------|-----------|-----------|
| 1.Th | 0.000000  | 0.000000  | 1.302182  |
| 2.Th | 0.000000  | 0.000000  | -1.302182 |
| 3.P  | 0.000000  | 0.000000  | 4.305639  |
| 4.H  | -1.059078 | -0.611459 | 5.056756  |
| 5.H  | 1.059078  | -0.611459 | 5.056756  |
| 6.H  | 0.000000  | 1.222918  | 5.056756  |
| 7.P  | 0.000000  | 0.000000  | -4.305639 |
| 8.H  | 1.059078  | 0.611459  | -5.056756 |
| 9.H  | 0.000000  | -1.222918 | -5.056756 |
| 10.H | -1.059078 | 0.611459  | -5.056756 |

H<sub>3</sub>PThThPH<sub>3</sub> ( E= -1.38132807 Hartree )\_C<sub>1</sub>

|      |           |           |           |
|------|-----------|-----------|-----------|
| 1.Th | 0.010609  | 0.084382  | 1.300468  |
| 2.Th | -0.000624 | -0.083983 | -1.300617 |
| 3.P  | 0.003151  | 0.038622  | 4.293265  |
| 4.H  | -1.068558 | -0.612943 | 4.987321  |
| 5.H  | 1.064321  | -0.611755 | 5.006019  |
| 6.H  | -0.002390 | 1.203300  | 5.139195  |
| 7.P  | -0.003213 | -0.038750 | -4.293164 |
| 8.H  | 1.065566  | 0.612370  | -4.992467 |
| 9.H  | -0.001573 | -1.203385 | -5.139159 |
| 10.H | -1.067290 | 0.612142  | -5.000860 |

Cy<sub>3</sub>PThThPCy<sub>3</sub> ( E= -21.49422664 Hartree )

|      |           |           |           |
|------|-----------|-----------|-----------|
| 1.P  | -4.287251 | 0.007663  | 0.039870  |
| 2.Th | -1.301360 | 0.037947  | -0.041767 |
| 3.Th | 1.303505  | 0.054305  | 0.054417  |
| 4.P  | 4.288553  | 0.017812  | -0.031466 |
| 5.C  | 5.019541  | -1.677516 | -0.497383 |
| 6.C  | 4.044833  | -2.777054 | -0.032502 |
| 7.C  | 5.313996  | -1.847114 | -1.996168 |

|      |           |           |           |
|------|-----------|-----------|-----------|
| 8.H  | 5.974070  | -1.782628 | 0.057532  |
| 9.C  | 4.565252  | -4.183704 | -0.345717 |
| 10.H | 3.079079  | -2.627873 | -0.558718 |
| 11.H | 3.826293  | -2.683272 | 1.043459  |
| 12.C | 5.831741  | -3.257228 | -2.312843 |
| 13.H | 4.384946  | -1.664533 | -2.570458 |
| 14.H | 6.057115  | -1.107780 | -2.335624 |
| 15.C | 4.862367  | -4.340420 | -1.837756 |
| 16.H | 3.825493  | -4.933607 | -0.016711 |
| 17.H | 5.489810  | -4.370371 | 0.234231  |
| 18.H | 6.011138  | -3.348150 | -3.398392 |
| 19.H | 6.809973  | -3.401949 | -1.814904 |
| 20.H | 5.273437  | -5.342817 | -2.048293 |
| 21.H | 3.916067  | -4.256149 | -2.405099 |
| 22.C | -5.077926 | 1.642088  | 0.614044  |
| 23.C | -5.373555 | 1.704614  | 2.120976  |
| 24.C | -4.147475 | 2.805725  | 0.219605  |
| 25.H | -6.037878 | 1.746505  | 0.068397  |
| 26.C | -5.944400 | 3.070618  | 2.527427  |
| 27.H | -4.436391 | 1.521377  | 2.681911  |
| 28.H | -6.087072 | 0.917609  | 2.413516  |
| 29.C | -4.723715 | 4.167952  | 0.619917  |
| 30.H | -3.175880 | 2.661785  | 0.735977  |
| 31.H | -3.927173 | 2.788425  | -0.859795 |
| 32.C | -5.021322 | 4.219524  | 2.119263  |
| 33.H | -6.121599 | 3.085533  | 3.617234  |
| 34.H | -6.930336 | 3.207466  | 2.042486  |
| 35.H | -4.016807 | 4.966933  | 0.337161  |
| 36.H | -5.657460 | 4.352010  | 0.053752  |
| 37.H | -5.471874 | 5.189372  | 2.392321  |
| 38.H | -4.070159 | 4.138857  | 2.678895  |
| 39.C | 5.011874  | 1.210601  | -1.308867 |
| 40.C | 4.180399  | 2.499919  | -1.432191 |
| 41.C | 6.508185  | 1.525710  | -1.173289 |
| 42.H | 4.863703  | 0.660770  | -2.258243 |
| 43.C | 4.674789  | 3.357031  | -2.603231 |
| 44.H | 4.241286  | 3.088173  | -0.499961 |
| 45.H | 3.113090  | 2.245586  | -1.575838 |
| 46.C | 6.994782  | 2.385836  | -2.347857 |
| 47.H | 6.687170  | 2.078116  | -0.232768 |
| 48.H | 7.101395  | 0.596373  | -1.114026 |
| 49.C | 6.169070  | 3.668654  | -2.479334 |
| 50.H | 4.088940  | 4.290708  | -2.657208 |
| 51.H | 4.493522  | 2.811780  | -3.549113 |
| 52.H | 8.064406  | 2.627505  | -2.218791 |
| 53.H | 6.909760  | 1.801513  | -3.283991 |
| 54.H | 6.511825  | 4.255728  | -3.348892 |
| 55.H | 6.335638  | 4.299193  | -1.584703 |

|       |           |           |           |
|-------|-----------|-----------|-----------|
| 56.C  | -4.977921 | -1.289068 | 1.231690  |
| 57.C  | -6.462433 | -1.642108 | 1.062733  |
| 58.C  | -4.107260 | -2.557157 | 1.279855  |
| 59.H  | -4.853994 | -0.797454 | 2.215776  |
| 60.C  | -6.930187 | -2.588778 | 2.176831  |
| 61.H  | -6.615681 | -2.140593 | 0.087925  |
| 62.H  | -7.085061 | -0.730202 | 1.055268  |
| 63.C  | -4.581253 | -3.499687 | 2.392511  |
| 64.H  | -4.146002 | -3.087935 | 0.312461  |
| 65.H  | -3.048570 | -2.280687 | 1.445788  |
| 66.C  | -6.064135 | -3.850155 | 2.237423  |
| 67.H  | -7.990339 | -2.856190 | 2.022034  |
| 68.H  | -6.872291 | -2.061086 | 3.148083  |
| 69.H  | -3.966344 | -4.416102 | 2.394439  |
| 70.H  | -4.423289 | -3.007722 | 3.371298  |
| 71.H  | -6.393610 | -4.499581 | 3.066867  |
| 72.H  | -6.204140 | -4.430274 | 1.304936  |
| 73.C  | 5.242125  | 0.407586  | 1.560896  |
| 74.C  | 4.840211  | 1.787057  | 2.108052  |
| 75.C  | 5.013679  | -0.674045 | 2.630227  |
| 76.H  | 6.320288  | 0.418999  | 1.304218  |
| 77.C  | 5.559790  | 2.117303  | 3.421422  |
| 78.H  | 3.745352  | 1.795923  | 2.278971  |
| 79.H  | 5.045862  | 2.575302  | 1.366749  |
| 80.C  | 5.737459  | -0.338082 | 3.940383  |
| 81.H  | 3.927159  | -0.762028 | 2.827915  |
| 82.H  | 5.354878  | -1.657774 | 2.268989  |
| 83.C  | 5.324744  | 1.034032  | 4.474788  |
| 84.H  | 5.219277  | 3.099413  | 3.793526  |
| 85.H  | 6.646395  | 2.208181  | 3.229023  |
| 86.H  | 5.530138  | -1.122999 | 4.688604  |
| 87.H  | 6.830298  | -0.346302 | 3.763456  |
| 88.H  | 5.877630  | 1.269565  | 5.400538  |
| 89.H  | 4.250293  | 1.012148  | 4.739429  |
| 90.C  | -5.220093 | -0.306618 | -1.581272 |
| 91.C  | -5.040592 | 0.858408  | -2.569232 |
| 92.C  | -4.753705 | -1.623318 | -2.223632 |
| 93.H  | -6.296904 | -0.385888 | -1.331489 |
| 94.C  | -5.744833 | 0.583980  | -3.904040 |
| 95.H  | -3.959088 | 1.011622  | -2.753943 |
| 96.H  | -5.429679 | 1.796027  | -2.140326 |
| 97.C  | -5.453997 | -1.891157 | -3.561353 |
| 98.H  | -3.659303 | -1.568772 | -2.389480 |
| 99.H  | -4.922960 | -2.471456 | -1.541409 |
| 100.C | -5.266904 | -0.725277 | -4.533079 |
| 101.H | -5.573214 | 1.429647  | -4.592702 |
| 102.H | -6.837211 | 0.528083  | -3.732990 |
| 103.H | -5.067265 | -2.827055 | -4.001099 |

|       |           |           |           |
|-------|-----------|-----------|-----------|
| 104.H | -6.535643 | -2.045438 | -3.382144 |
| 105.H | -5.805889 | -0.919181 | -5.476477 |
| 106.H | -4.194042 | -0.634511 | -4.789199 |

Me<sub>3</sub>PThThPMe<sub>3</sub> ( E= -5.08064138 Hartree )

|      |           |           |           |
|------|-----------|-----------|-----------|
| 1.Th | -0.004095 | -0.029420 | 1.300199  |
| 2.Th | -0.044397 | 0.012257  | -1.300215 |
| 3.P  | 0.068051  | -0.080293 | 4.295667  |
| 4.P  | -0.081207 | 0.076665  | -4.295966 |
| 5.C  | -1.494647 | 0.962997  | -5.100949 |
| 6.H  | -2.438645 | 0.495854  | -4.792351 |
| 7.H  | -1.504326 | 2.008443  | -4.766983 |
| 8.H  | -1.413056 | 0.930952  | -6.197325 |
| 9.C  | -0.139551 | -1.552167 | -5.176248 |
| 10.H | 0.736042  | -2.149554 | -4.891396 |
| 11.H | -1.041130 | -2.097759 | -4.869573 |
| 12.H | -0.148857 | -1.416150 | -6.267579 |
| 13.C | 1.361742  | 0.879108  | -5.135768 |
| 14.H | 1.441027  | 1.921880  | -4.802751 |
| 15.H | 2.283959  | 0.357164  | -4.849898 |
| 16.H | 1.251776  | 0.852877  | -6.229818 |
| 17.C | -1.318113 | -0.951113 | 5.162834  |
| 18.H | -2.270434 | -0.478434 | 4.890230  |
| 19.H | -1.349386 | -1.998359 | 4.835896  |
| 20.H | -1.191602 | -0.913371 | 6.254794  |
| 21.C | 0.056791  | 1.553519  | 5.168673  |
| 22.H | 0.923986  | 2.143382  | 4.845135  |
| 23.H | -0.852947 | 2.103795  | 4.896244  |
| 24.H | 0.091045  | 1.422922  | 6.260230  |
| 25.C | 1.537596  | -0.889175 | 5.081390  |
| 26.H | 1.597357  | -1.933669 | 4.749635  |
| 27.H | 2.451215  | -0.374101 | 4.757971  |
| 28.H | 1.470231  | -0.858362 | 6.178799  |

Ph<sub>3</sub>PThThPPh<sub>3</sub> ( E= -16.40745734 Hartree )

|      |           |           |           |
|------|-----------|-----------|-----------|
| 1.P  | -4.194856 | -0.241288 | -0.315895 |
| 2.Th | -1.297944 | -0.125675 | -0.182520 |
| 3.Th | 1.297944  | 0.125675  | 0.182520  |
| 4.P  | 4.194856  | 0.241288  | 0.315895  |
| 5.C  | 5.111855  | 1.814374  | -0.003757 |
| 6.C  | 4.519362  | 2.759049  | -0.854119 |
| 7.C  | 6.348977  | 2.101997  | 0.586667  |
| 8.C  | 5.162765  | 3.963791  | -1.127524 |
| 9.H  | 3.548755  | 2.539259  | -1.310373 |
| 10.C | 6.986755  | 3.313516  | 0.316862  |
| 11.H | 6.812813  | 1.379183  | 1.260450  |
| 12.C | 6.398645  | 4.243278  | -0.541034 |
| 13.H | 4.694872  | 4.690030  | -1.795816 |

|      |           |           |           |
|------|-----------|-----------|-----------|
| 14.H | 7.951494  | 3.531694  | 0.780415  |
| 15.H | 6.901620  | 5.190110  | -0.748902 |
| 16.C | -5.111855 | -1.814374 | 0.003757  |
| 17.C | -4.519362 | -2.759049 | 0.854119  |
| 18.C | -6.348977 | -2.101997 | -0.586667 |
| 19.C | -5.162765 | -3.963791 | 1.127524  |
| 20.H | -3.548755 | -2.539259 | 1.310373  |
| 21.C | -6.986755 | -3.313516 | -0.316862 |
| 22.H | -6.812813 | -1.379183 | -1.260450 |
| 23.C | -6.398645 | -4.243278 | 0.541034  |
| 24.H | -4.694872 | -4.690030 | 1.795816  |
| 25.H | -7.951494 | -3.531694 | -0.780415 |
| 26.H | -6.901620 | -5.190110 | 0.748902  |
| 27.C | -5.130155 | 0.500471  | -1.718993 |
| 28.C | -6.119551 | 1.476996  | -1.528808 |
| 29.C | -4.782548 | 0.119215  | -3.025215 |
| 30.C | -6.745903 | 2.059705  | -2.630855 |
| 31.H | -6.397529 | 1.780058  | -0.517124 |
| 32.C | -5.421995 | 0.692471  | -4.119975 |
| 33.H | -4.007096 | -0.636122 | -3.181593 |
| 34.C | -6.402360 | 1.670344  | -3.925615 |
| 35.H | -7.512571 | 2.822307  | -2.475482 |
| 36.H | -5.151018 | 0.381642  | -5.131347 |
| 37.H | -6.895581 | 2.129101  | -4.784943 |
| 38.C | 5.130155  | -0.500471 | 1.718993  |
| 39.C | 6.119551  | -1.476996 | 1.528808  |
| 40.C | 4.782548  | -0.119215 | 3.025215  |
| 41.C | 6.745903  | -2.059705 | 2.630855  |
| 42.H | 6.397529  | -1.780058 | 0.517124  |
| 43.C | 5.421995  | -0.692471 | 4.119975  |
| 44.H | 4.007096  | 0.636122  | 3.181593  |
| 45.C | 6.402360  | -1.670344 | 3.925615  |
| 46.H | 7.512571  | -2.822307 | 2.475482  |
| 47.H | 5.151018  | -0.381642 | 5.131347  |
| 48.H | 6.895581  | -2.129101 | 4.784943  |
| 49.C | 4.595454  | -0.812509 | -1.129261 |
| 50.C | 4.021995  | -2.101269 | -1.177603 |
| 51.C | 5.364618  | -0.366158 | -2.215945 |
| 52.C | 4.193523  | -2.904091 | -2.304308 |
| 53.H | 3.462839  | -2.483191 | -0.317987 |
| 54.C | 5.534593  | -1.178383 | -3.334549 |
| 55.H | 5.827586  | 0.621894  | -2.185362 |
| 56.C | 4.944119  | -2.445305 | -3.386621 |
| 57.H | 3.741934  | -3.898018 | -2.332069 |
| 58.H | 6.133829  | -0.819340 | -4.174218 |
| 59.H | 5.078200  | -3.076741 | -4.267149 |
| 60.C | -4.595454 | 0.812509  | 1.129261  |
| 61.C | -4.021995 | 2.101269  | 1.177603  |



|      |           |           |          |
|------|-----------|-----------|----------|
| 62.C | -5.364618 | 0.366158  | 2.215945 |
| 63.C | -4.193523 | 2.904091  | 2.304308 |
| 64.H | -3.462839 | 2.483191  | 0.317987 |
| 65.C | -5.534593 | 1.178383  | 3.334549 |
| 66.H | -5.827586 | -0.621894 | 2.185362 |
| 67.C | -4.944119 | 2.445305  | 3.386621 |
| 68.H | -3.741934 | 3.898018  | 2.332069 |
| 69.H | -6.133829 | 0.819340  | 4.174218 |
| 70.H | -5.078200 | 3.076741  | 4.267149 |

H<sub>3</sub>NThThNH<sub>3</sub> ( E= -1.69539852 Hartree )

|      |           |           |           |
|------|-----------|-----------|-----------|
| 1.Th | 0.308149  | 0.082608  | 1.201432  |
| 2.Th | 0.245147  | 0.321222  | -1.434558 |
| 3.N  | 0.166344  | 0.546222  | -4.081569 |
| 4.N  | 0.370136  | -0.156877 | 3.847799  |
| 5.H  | 1.015925  | 0.998326  | -4.442422 |
| 6.H  | -0.636599 | 1.108376  | -4.389845 |
| 7.H  | 0.091466  | -0.373564 | -4.533619 |
| 8.H  | 0.321552  | 0.760801  | 4.307941  |
| 9.H  | -0.422613 | -0.714516 | 4.189622  |
| 10.H | 1.231494  | -0.617226 | 4.166752  |

NHCThThNHC ( E= -4.46492813 Hartree )

|      |           |           |           |
|------|-----------|-----------|-----------|
| 1.Th | -1.619608 | 0.978290  | -0.093462 |
| 2.Th | 0.955734  | 0.250374  | -0.097769 |
| 3.C  | -4.080184 | 1.757690  | -0.027180 |
| 4.C  | -6.329448 | 1.997169  | -0.444444 |
| 5.C  | -6.002034 | 2.892283  | 0.528356  |
| 6.H  | -7.277958 | 1.788973  | -0.923666 |
| 7.H  | -6.610468 | 3.614519  | 1.058457  |
| 8.C  | 3.457327  | -0.385722 | -0.045454 |
| 9.C  | 5.716608  | -0.438424 | -0.472444 |
| 10.C | 5.473532  | -1.335100 | 0.523157  |
| 11.H | 6.641131  | -0.159592 | -0.962619 |
| 12.H | 6.145661  | -1.987340 | 1.066790  |
| 13.N | -5.158898 | 1.329213  | -0.759684 |
| 14.H | -5.071521 | 0.593725  | -1.455364 |
| 15.N | -4.648188 | 2.727935  | 0.760483  |
| 16.H | -4.098902 | 3.254376  | 1.434526  |
| 17.N | 4.491145  | 0.116714  | -0.795561 |
| 18.H | 4.336395  | 0.826266  | -1.506579 |
| 19.N | 4.111080  | -1.284853 | 0.759672  |
| 20.H | 3.614374  | -1.837721 | 1.452770  |

ONThThNO ( E= -1.32849595 Hartree )

|      |          |          |          |
|------|----------|----------|----------|
| 1.O  | 0.000000 | 0.000000 | 4.748362 |
| 2.N  | 0.000000 | 0.000000 | 3.519295 |
| 3.Th | 0.000000 | 0.000000 | 1.444051 |

|      |          |          |           |
|------|----------|----------|-----------|
| 4.Th | 0.000000 | 0.000000 | -1.444051 |
| 5.N  | 0.000000 | 0.000000 | -3.519295 |
| 6.O  | 0.000000 | 0.000000 | -4.748362 |

OCThThCO ( E= -1.39592341 Hartree )

|      |          |          |           |
|------|----------|----------|-----------|
| 1.O  | 0.000000 | 0.000000 | 4.912205  |
| 2.C  | 0.000000 | 0.000000 | 3.730288  |
| 3.Th | 0.000000 | 0.000000 | 1.382857  |
| 4.Th | 0.000000 | 0.000000 | -1.382857 |
| 5.C  | 0.000000 | 0.000000 | -3.730288 |
| 6.O  | 0.000000 | 0.000000 | -4.912205 |
